# Supplementary material for: Realization of color hue tuning via efficient Tb3+–Mn2+ energy transfer in Sr3Tb(PO4)3:Mn2+, a potential near-UV excited phosphor for white LEDs
Source: Royal Society of Chemistry journal article supplement (doi:10.1039/c3cp50363a), 2013-01-01
Supplement: c3cp50363a.pdf [file c3cp50363a.pdf]

**Supporting information**

**Realization of Color hue tuning via efficient Tb<sup>3+</sup>-Mn<sup>2+</sup> energy transfer in  
Sr<sub>3</sub>Tb(PO<sub>4</sub>)<sub>3</sub>:Mn<sup>2+</sup>, a potential near-UV excited phosphor for White LEDs**

Yongchao Jia,<sup>a,b</sup> Wei Lü,<sup>a</sup> Ning Guo,<sup>a,b</sup> Wenzhen Lü,<sup>a,b</sup> Qi Zhao,<sup>a,b</sup> Hongpeng You<sup>a,\*</sup>

*<sup>a</sup>State key Laboratory of Rare Earth Resource Utilization, Changchun Institute of Applied Chemistry, Chinese Academy of Sciences, Changchun 130022, P. R. China.*

*<sup>b</sup>Graduate University of the Chinese Academy of Sciences, Beijing 100049, P. R. China.*

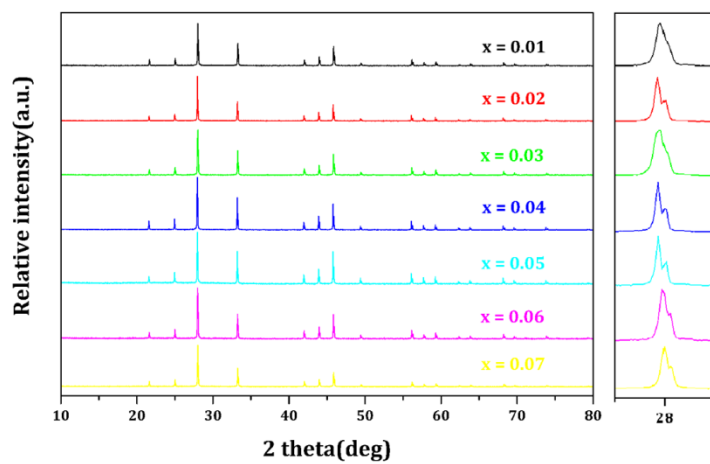

**Figure S1.** XRD patterns of STP: $x\text{Mn}^{2+}$  ( $x = 0.01, 0.02, 0.03, 0.04, 0.05, 0.06, 0.07$ ).

The panel on the right details the evolution of reflection near  $2\theta = 28.0^\circ$ .

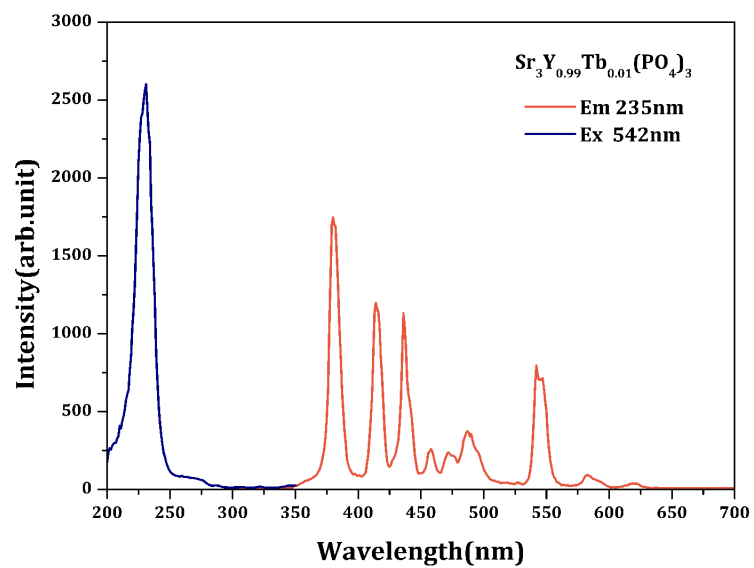

**FigureS2.** PLE and PL spectra of the  $\text{Sr}_3\text{Y}_{0.99}(\text{PO}_4)_3:0.01\text{Tb}^{3+}$  phosphor.

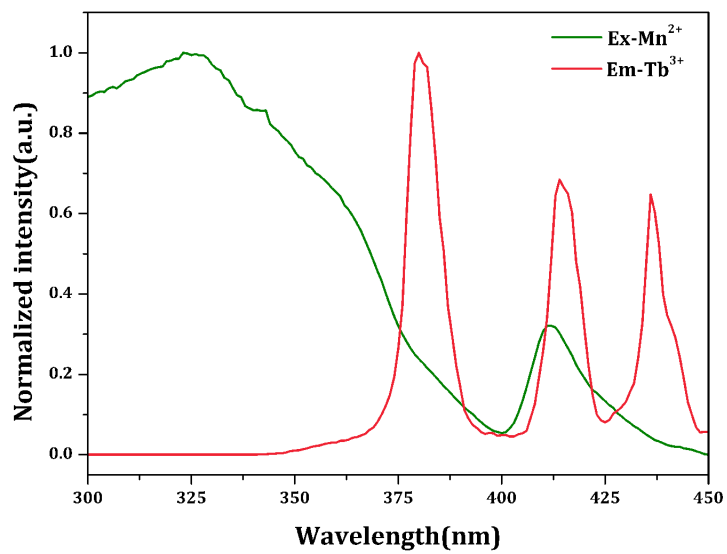

**Figure S3.** Spectra overlap between the normalized PL of  $\text{Sr}_3\text{Y}_{0.99}(\text{PO}_4)_3:0.01\text{Tb}^{3+}$  and PLE of  $\text{Sr}_{2.91}\text{Y}(\text{PO}_4)_3:0.09\text{Mn}^{2+}$ .
